# Supplementary material for: Characterisation of thin boron-doped diamond films using Raman spectroscopy and chemometrics
Source: Royal Society of Chemistry journal article supplement (doi:10.1039/c8ay02468e), 2018-12-26
Supplement: c8ay02468e1.pdf [file c8ay02468e1.pdf]

## Supporting Information

### Characterisation of thin boron-doped diamond films using Raman spectroscopy and chemometrics

Peter Knittel,<sup>\*a</sup> Robert Stach,<sup>b</sup> Taro Yoshikawa,<sup>a</sup> Lutz Kirste,<sup>a</sup> Boris Mizaikoff,<sup>b</sup> Christine Kranz,<sup>b</sup> Christoph E. Nebel<sup>a</sup>

**Table 1** (as shown in the manuscript): Substrates grown for the calibration and validation of the PLSR model for determining thickness and boron concentration (Reference values obtained by SIMS). Substrate resistivity was measured with a 4-point probe. Roughness was obtained from AFM measurements.

| ID | Thickness / nm | B concentration / $10^{20} \cdot \text{cm}^{-3}$ | Substrate resistivity / $\Omega$ | Roughness RMS / nm |
|----|----------------|--------------------------------------------------|----------------------------------|--------------------|
| 1  | 60             | 7.47                                             | 4                                | 12.9               |
| 2  | 100            | 24.7                                             | 20                               | 15.0               |
| 3  | 165            | 33.3                                             | 10                               | 20.1               |
| 4  | 200            | 21.7                                             | 7                                | 30.9               |
| 5  | 220            | 23.2                                             | 9                                | 28.9               |
| 6  | 270            | 21.8                                             | 13                               | 29.4               |
| 7  | 300            | 16.2                                             | 8                                | 36.0               |
| 8  | 450            | 14.2                                             | 10                               | 40.4               |
| 9  | 470            | 17.1                                             | 7.5                              | 41.4               |
| 10 | 520            | 32.3                                             | 7                                | 35.6               |
| 11 | 620            | 30.4                                             | 4                                | 42.5               |
| C1 | 90             | 18.9                                             | 0.02                             | 16.2               |
| C2 | 240            | 24.6                                             | 0.06                             | 31.7               |
| C3 | 245            | 30.7                                             | 0.09                             | 30.8               |
| C4 | 370            | 6.39                                             | 0.05                             | 39.0               |

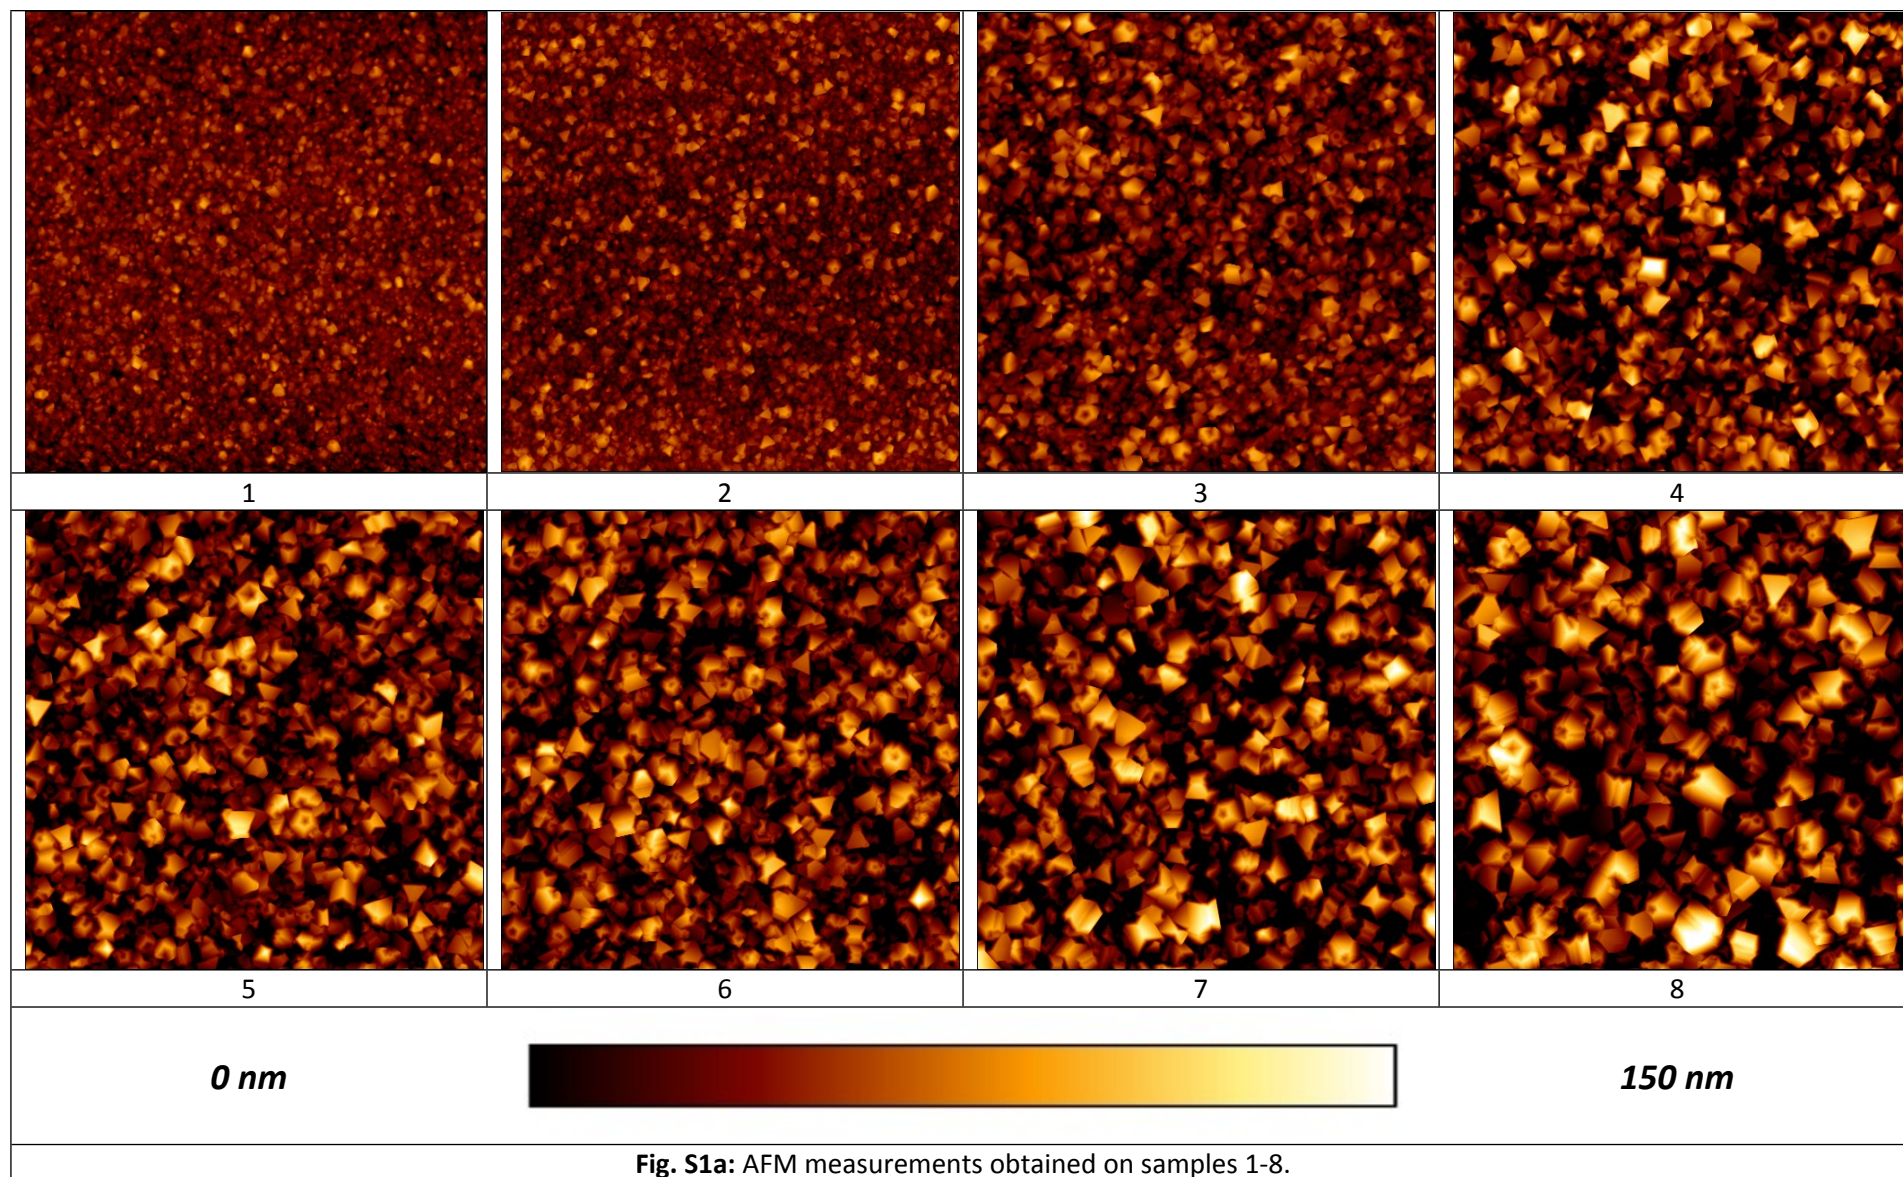



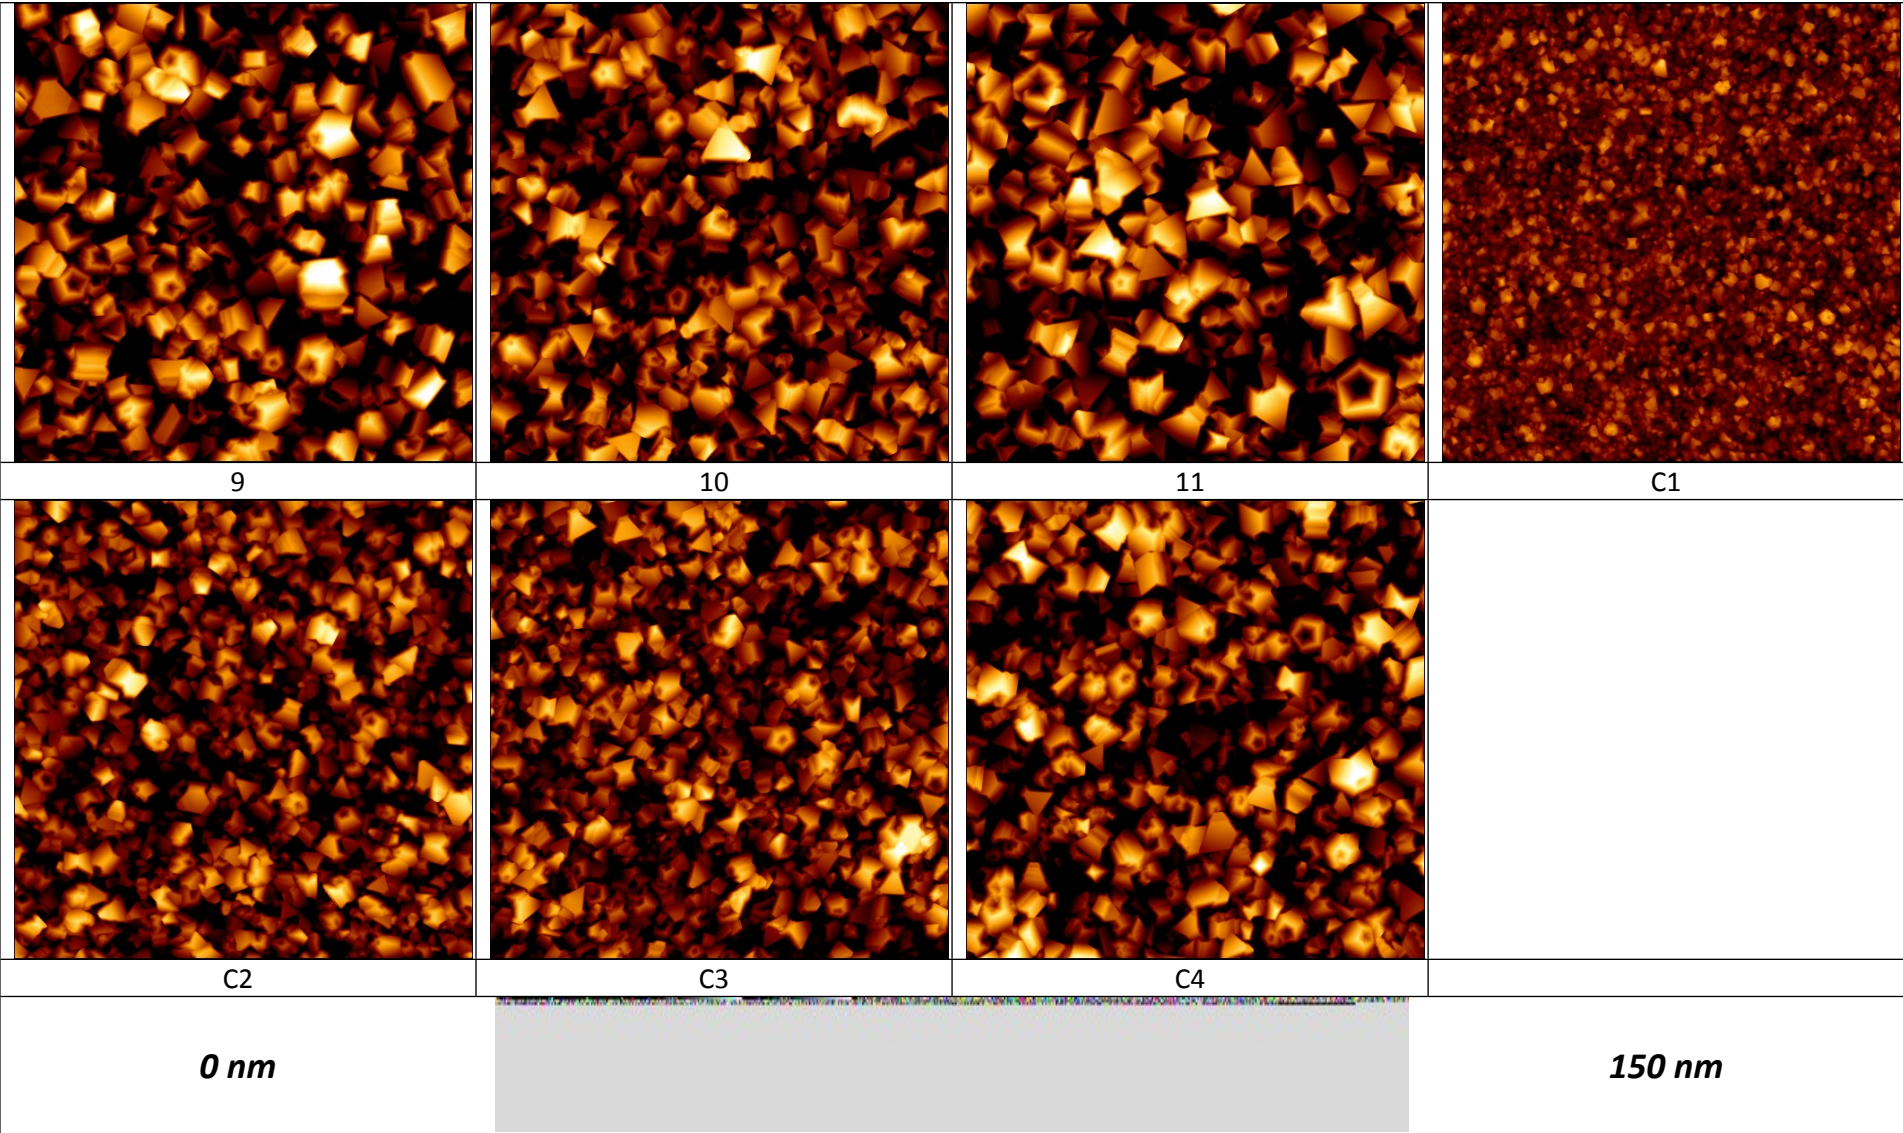

**Fig. S1b:** AFM measurements obtained on samples 9-11 and diamond layers on conductive substrates C1-C4.

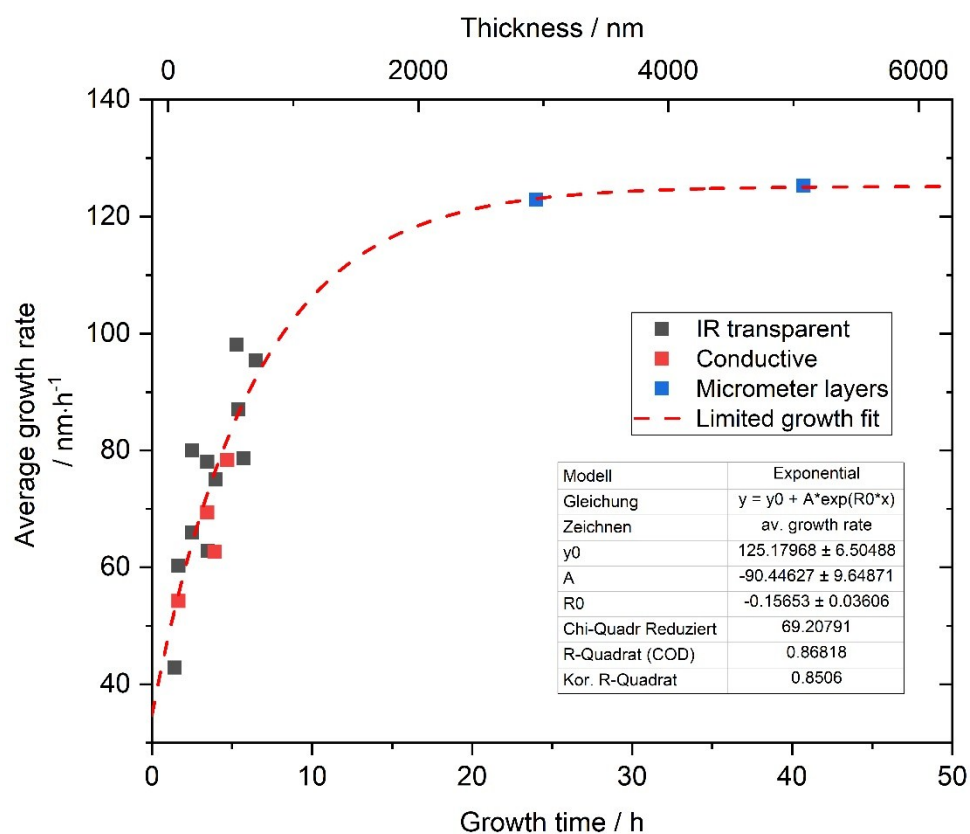

**Fig. S2:** Average growth rate vs. growth time and thickness of diamond films listed in Table 1 and 2. Films with micron-sized thickness were fitted with a limited-growth model.

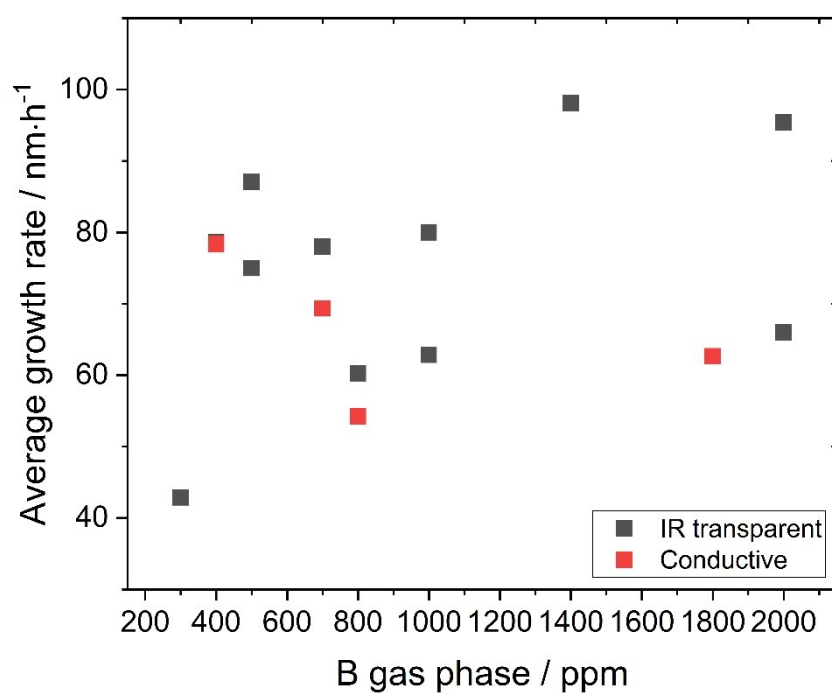

**Fig. S3:** Average growth rate vs. boron concentration in the gas phase during synthesis of diamond films described in Table 1.

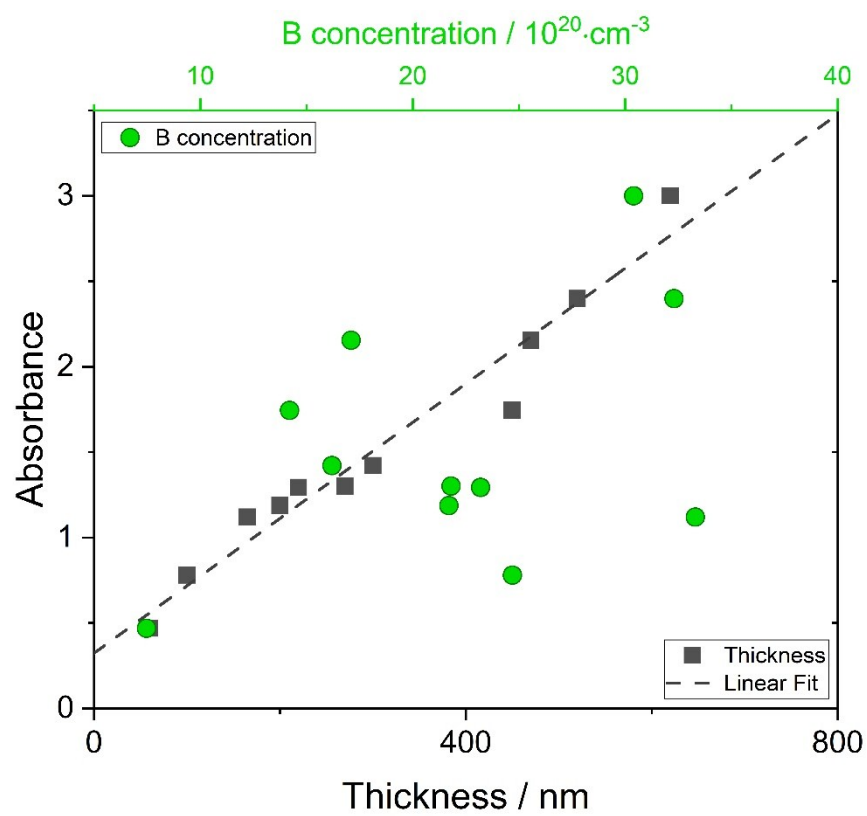

**Fig. S4:** IR absorbance (measured at 2750 cm<sup>-1</sup>) vs. thickness and boron concentration of IR transparent samples 1-11.
